# Supplementary material
Source: PubMed Central journal article supplement (PMC2141914)
Supplement: pnas_0707340104_1.pdf [file pnas_0707340104_1.pdf]

## SI Text

Primers for inverse PCR for *AMA1* were CCATCTGGGGTATCGGTTGC and TTGGGATTGTGAGGTTTAGAGGTC, and for *PHA1* CGTCAACCGTCTCCTC and ACGCATGGGCAGTCTAC.

For 3' RACE, initial and nested primers from GeneRacer (Invitrogen) were used. For the other 3' *AMA1* RACE primers, the initial primer was CCCATTCGAACCTAACTCCAAGAC and the nested primer was CCTCTAAACCTCACAATCCCAATG. For 5' RACE of the *AMA1* cDNA, the initial primer was GCCCAAGCCTGATAACGTCCACAACCT and the nested primer was TATCGCCCACTACTTCGTGTCATA. For *PHA1*, the 3' initial primer was GACCTCTGCTCTAAATCACAATG and the 3' nested primer was ATCAATGCCACCCGTCTTCCTG. The 5' initial *PHA1* primer was CGGATCATTACGTGGGTTTAA and the 5' nested primer was AACTTGCCTTGACTAGTGGATGAGAC.

Degenerate primers for amplification of toxin genes from *A. phalloides* were ATGTCNGAYATYAAYGCNACNCG (forward) and AAGGSYCTCGCCACGAGTGAGGAGWSKRKTGAC (reverse), in which W indicates A or T, S indicates C or G, K indicates G or T, R indicates A or G, and Y indicates T or C.

Primers to amplify a portion of the *A. bisporigera* tubulin gene were ACCTCCATCTCGTCCATACCTTCC and TGTTTGCCACGCTGCATACTA.

**Sequences orthologous to human prolyl oligopeptidase (POP) in *A. bisporigera* and other fungi.** The following genome survey sequences were identified in the *A. bisporigera* genome (subject) by TBLASTN using human POP (GenBank NP\_002717) as query:

>ECGK9L002JKSHR R length=112  
Length = 112

Score = 47.8 bits (112), Expect = 4e-06  
Identities = 20/33 (60%), Positives = 26/33 (78%)  
Frame = +3

Query: 436 QTVQIFYPKDGTKIPMFIVHKKSILKDGSHPA 468  
++ Q++Y SKDGTK+PMFIV KS K DG+ PA  
Sbjct: 3 ESTQVWYESKDGTKVPMFIVRHKSTKFDGTAPA 101

>contig26093 length=206 numReads=6  
Length = 206

Score = 41.2 bits (95), Expect = 3e-04  
Identities = 18/32 (56%), Positives = 23/32 (71%)  
Frame = +1

Query: 440 IFYPSKDGTKIPMFIVHKKSILKDGSHPAFLY 471  
++Y S DGTKIPMFIV K+ K +G+ PA Y  
Sbjct: 109 VWYDSYDGTKIPMFIVRHKNTKFNGTAPAIQY 204

>ECIM01V02I2IO5 S length=107  
Length = 107

Score = 35.8 bits (81), Expect = 0.014  
Identities = 18/27 (66%), Positives = 21/27 (77%), Gaps = 1/27 (3%)  
Frame = +2

Query: 546 KRLTINGGSNGGLLVAAC-ANQRPDLF 571  
++L I+GGSNGGLLV A QRPDLF  
Sbjct: 26 EKLAISSGGSNGGLLVGASRLTQRPDLF 106

>ECIM01V01CKHE5 R length=94  
Length = 94

Score = 35.4 bits (80), Expect = 0.019  
Identities = 16/27 (59%), Positives = 19/27 (70%)  
Frame = +2

Query: 120 SDDGTVALRGYAFSEGEYFAYGLSAS 146  
S DGT +L Y FS G+YFAYG+S S  
Sbjct: 2 SSDGTASLSMYDFSHCGKYFAYGISLS 82

>EEISCGG02IHTSV R length=106  
Length = 106

Score = 33.1 bits (74), Expect = 0.093  
Identities = 14/20 (70%), Positives = 15/20 (75%)  
Frame = -2

Query: 669 PLLIHVDTKAGHGAGKPTAK 688  
PLL+ VD KAGHG GK T K  
Sbjct: 105 PLLLRVDKKAGHGGGKSTEK 46

```
>ECIM01V02H2WNR S length=78
      Length = 78

Score = 28.9 bits (63), Expect = 1.7
Identities = 12/16 (75%), Positives = 13/16 (81%)
Frame = +2

Query: 446 DGTKIPMFIVHKKSIK 461
          DGTK+PMFIV  KS K
Sbjct: 2   DGTKVPMFIVRHKSTK 49
```

Orthologs of human POP in other Basidiomycetes are: *Coprinus cinereus* (GenBank CC1G\_09936), *Ustilago maydis* (GenBank UM05288), *Cryptococcus neoformans* (GenBank XP\_567311 and XP\_567292), *Laccaria bicolor* (Lacbi1|303722), *Phanerochaete chrysosporium* (Phchr1|1293), *Puccinia graminis* (PGTG\_14822.2), and *Sporobolomyces roseus* (Sporo1|33368).

The genome sequences of *L. bicolor*, *P. chrysosporium*, and *S. roseus* are available at <http://genome.jgi-psf.org/>. The genome sequence of *P. graminis* is available at [http://www.broad.mit.edu/annotation/genome/puccinia\\_graminis](http://www.broad.mit.edu/annotation/genome/puccinia_graminis).
